# Supplementary material
Source: publisher site journal article supplement (https://static.cambridge.org/content/id/urn:cambridge.org:id:article:S0007114520003955/resource/name/S0007114520003955supp002.docx)
Supplement: Supplementary file 1 [file S0007114520003955supp002.docx]

1991-2009 seven surveys with at least one round egg consumption data

*n* = 20 741 (age≥18 years)

1991-2009 seven surveys with at least three rounds egg consumption data

*n* = 10 495 (age>20 years)

Egg consumption data available at all seven rounds for sensitivity analysis

*n* = 2 425

Diabetes information available 2009

*n* = 8 545

(age ≥ 18 years)

Mean egg consumption 1991-2009

Trajectory analysis

Egg consumption data available at all seven rounds for sensitivity analysis

n = 2 246

Diabetes information available 2009

*n* = 6 224

| **Year** | **No. of diet measured** | **No. of fasting blood glucose measured** |
| --- | --- | --- |
| 1991 | 9 229 |  |
| 1993 | 8 838 |  |
| 1997 | 9 487 |  |
| 2000 | 10 392 |  |
| 2004 | 9 718 |  |
| 2006 | 9 594 |  |
| 2009 | 9 942 | 8 545 |

**Supplementary Fig. 1.** Flow chart of study sample and analysis road map.
